# Supplementary material for: Prospective identification of functionally distinct stem cells and neurosphere-initiating cells in adult mouse forebrain
Source: eLife journal article supplement (doi:10.7554/elife.02669), 2014-05-07
Supplement: supp [file elife-02669-supp-v1.zip]

Archive with 5 entries (5 files):
- elife_poa_e02669_Figure_6_figure_supplement_1.pdf
- elife_poa_e02669_Supplementary_file_1.docx
- elife_poa_e02669_Figure_7_figure_supplement_1.pdf
- elife_poa_e02669_Figure_7_figure_supplement_2.pdf
- elife_poa_e02669_Figure_1_figure_supplement_1.pdf
