# Supplementary material for: Prospective identification of functionally distinct stem cells and neurosphere-initiating cells in adult mouse forebrain
Source: eLife journal article supplement (doi:10.7554/elife.02669), 2014-05-07

**Figure 1-figure supplement 1**

**A**

Setting up the first gate for debris exclusion

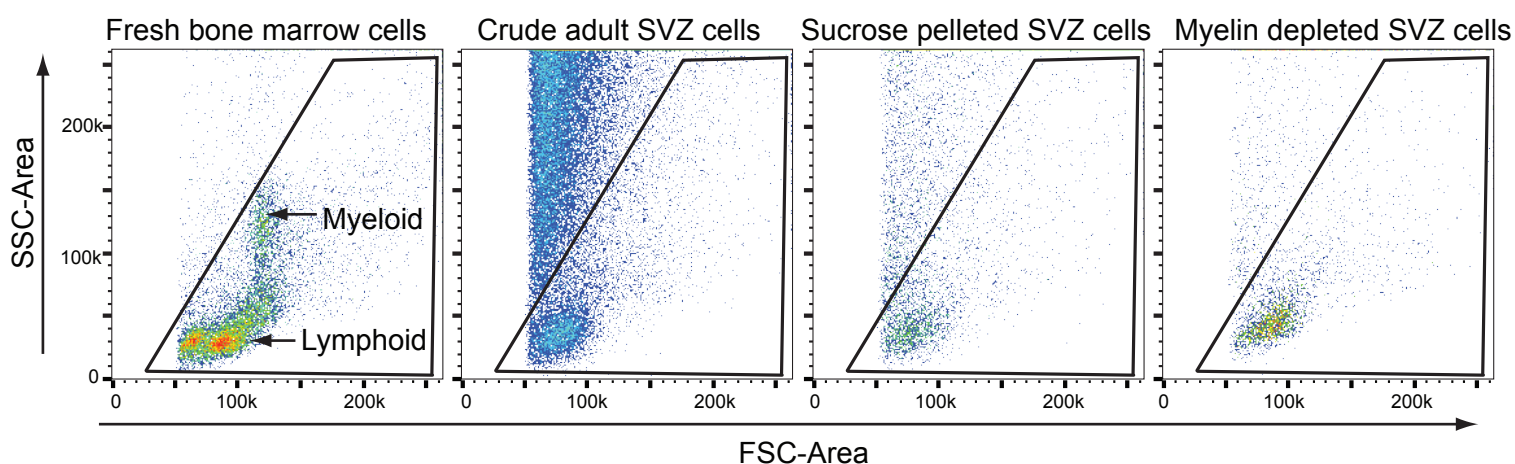

**B**

Drawing the sixth gate to resolve GEPCOT cells on the basis of CD24 expression

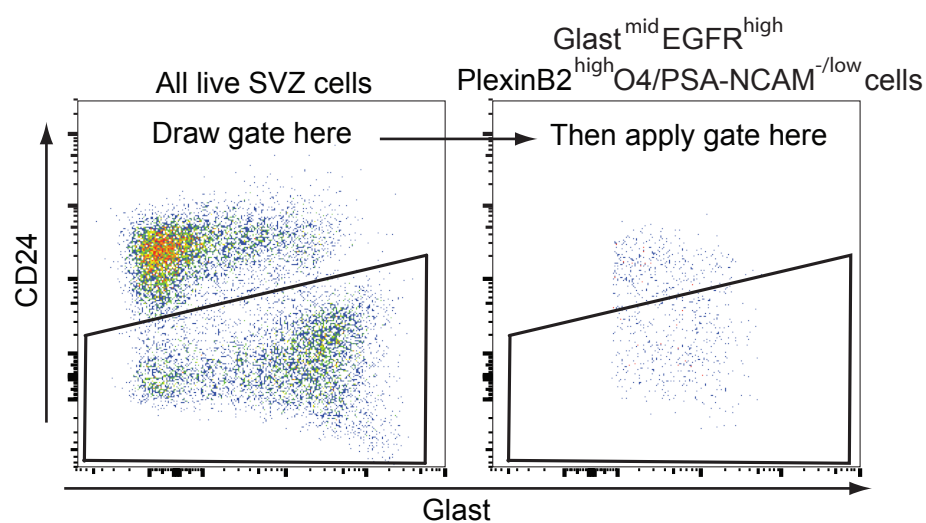

**C**

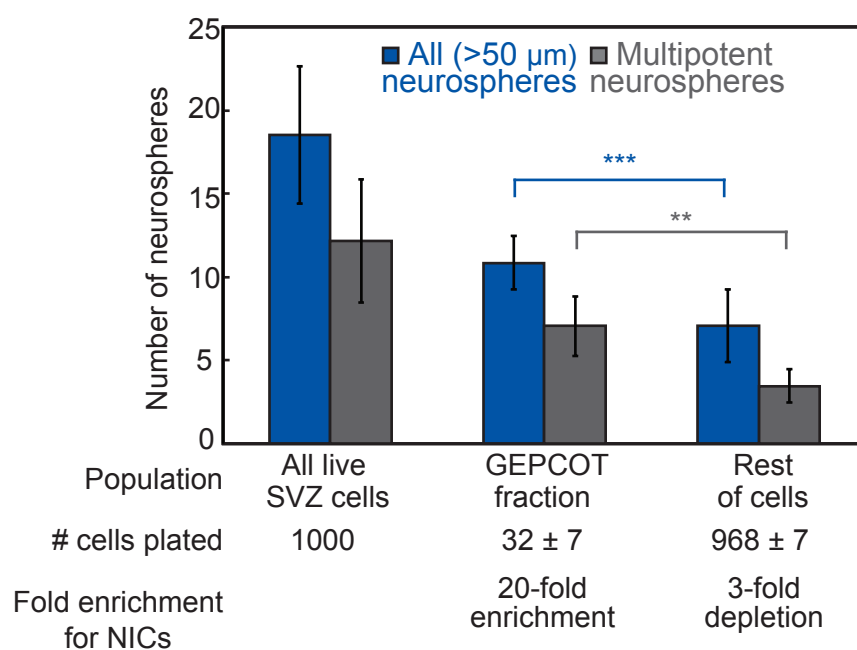

Supplement: supp [file elife-02669-supp-v1.zip › elife_poa_e02669_Figure_1_figure_supplement_1.pdf]
