# Supplementary figures and images for: Prospective identification of functionally distinct stem cells and neurosphere-initiating cells in adult mouse forebrain
Source: eLife journal article supplement (doi:10.7554/elife.02669), 2014-05-07

Figure 6-figure supplement 1

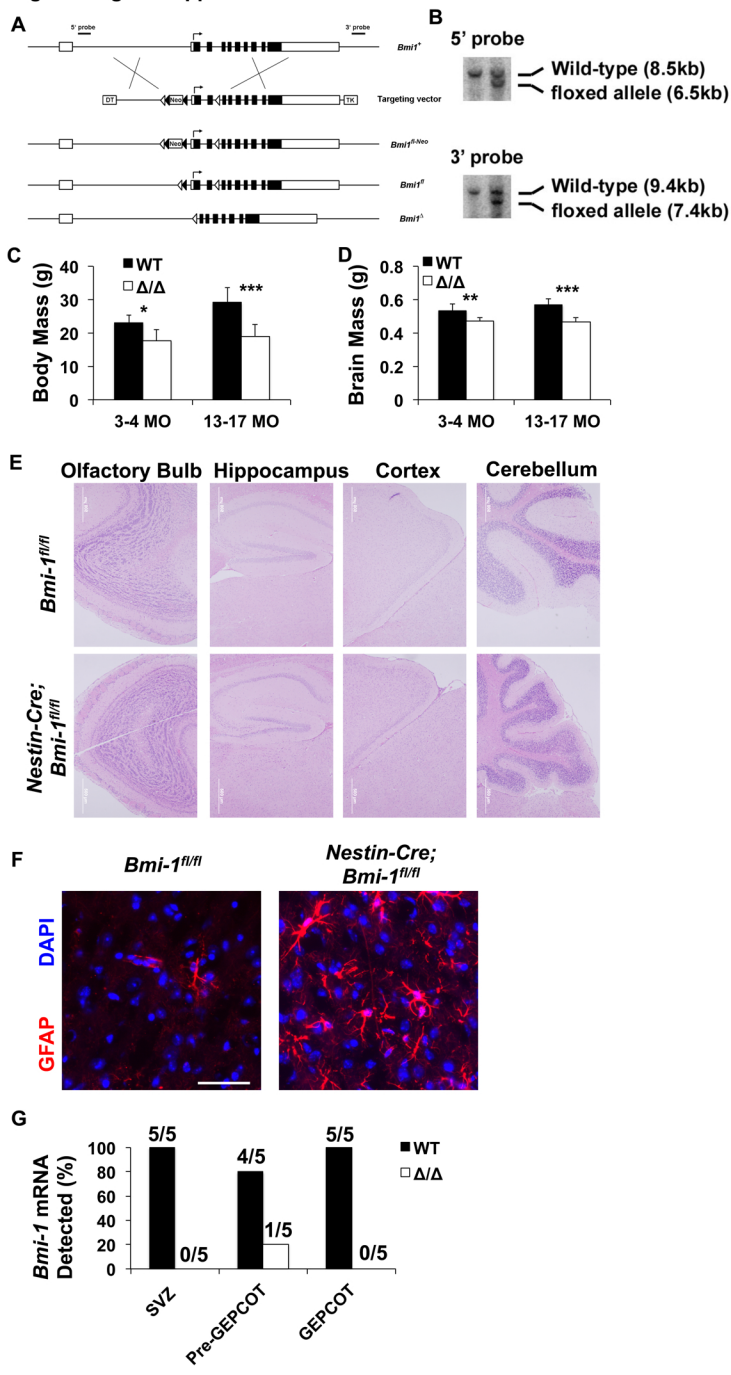

Supplement: supp [file elife-02669-supp-v1.zip › elife_poa_e02669_Figure_6_figure_supplement_1.pdf]

**Figure 7-figure supplement 1**

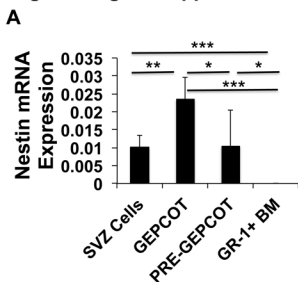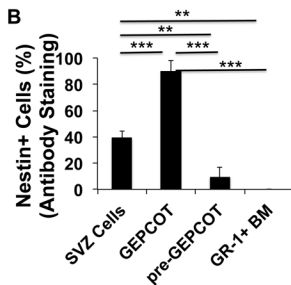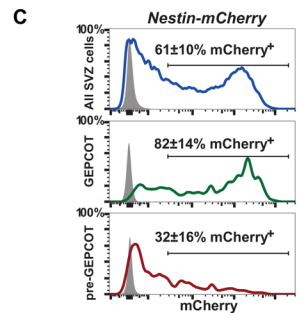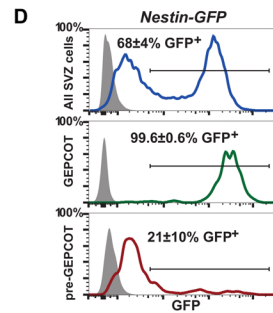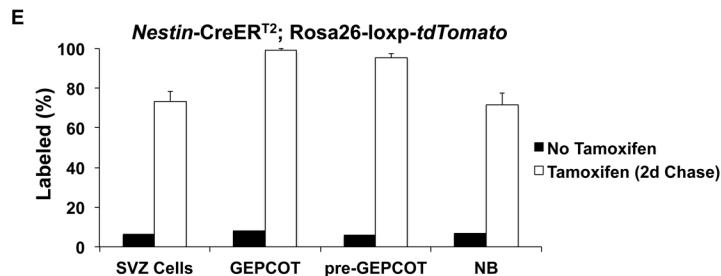

Supplement: supp [file elife-02669-supp-v1.zip › elife_poa_e02669_Figure_7_figure_supplement_1.pdf]
